# Supplementary material
Source: publisher figshare collection journal article supplement (https://asha.figshare.com/articles/dataset/_/19320068)
Supplement: Supplementary file 1 [file 1]

**Supplemental Material S1.** Details regarding deferred treatment/usual care participants.

| Participant | Distinction<br>within control |                                                                              |
|-------------|-------------------------------|------------------------------------------------------------------------------|
|             | group                         | Activities during control phase                                              |
| C1          | DT                            | No outpatient speech therapy                                                 |
| C2          | UC                            | Outpatient speech therapy                                                    |
| C3          | UC                            | Outpatient speech therapy                                                    |
| C4          | DT                            | Part-time work as a baker                                                    |
| C5          | DT                            | Part-time work serving food in hospital                                      |
| C6          | UC                            | Outpatient speech therapy, volunteering at the hospital                      |
| C7          | UC                            | Outpatient speech therapy                                                    |
| C8          | DT                            | Server at a restaurant                                                       |
| C9          | UC                            | Outpatient speech therapy                                                    |
| C10         | DT                            | Part-time work at a grocery store                                            |
| C11         | UC                            | Outpatient brain injury group therapy, volunteering at the library           |
| C12         | UC                            | Outpatient brain injury group once/week, part-time work at the grocery store |
| C13         | UC                            | Outpatient speech therapy                                                    |
| C14         | UC                            | Outpatient speech therapy                                                    |

*Note.* UC = usual care (i.e., participants who attended outpatient speech therapy in the community during their time in the control group); DT = deferred treatment (i.e., participants who did not attend outpatient speech therapy in the community during their time in the control group). Five participants deferred treatment during the control phase, while nine participants attended usual care during the control phase.
