# Supplementary material
Source: publisher figshare collection journal article supplement (https://asha.figshare.com/articles/dataset/_/19320068)
Supplement: Supplementary file 2 [file 1]

**Supplemental Material S2.** Subtest scores for standardized assessment battery.

| Treatment participants |                        |             |            |           |             |             |                                               |                        |             |             |                      |           |                        |             |                                               |            |                        |             |            |             |            |            |             |
|------------------------|------------------------|-------------|------------|-----------|-------------|-------------|-----------------------------------------------|------------------------|-------------|-------------|----------------------|-----------|------------------------|-------------|-----------------------------------------------|------------|------------------------|-------------|------------|-------------|------------|------------|-------------|
| Language               |                        |             |            |           |             |             |                                               |                        |             |             |                      |           | Other Cognitive        |             |                                               |            |                        |             |            |             |            |            |             |
|                        | WAB-R<br>(out of 100%) |             |            |           |             |             | RBANS<br>( <i>M</i> = 100,<br><i>SD</i> = 15) | SCCAN<br>(out of 100%) |             |             | DCT<br>(out of 100%) |           | WAB-R<br>(out of 100%) |             | RBANS<br>( <i>M</i> = 100,<br><i>SD</i> = 15) |            | SCCAN<br>(out of 100%) |             |            |             |            |            |             |
|                        | SS                     | AVC         | REP        | NWF       | READ        | WRITE       | LANG                                          | OE                     | SP          | RC          | WR                   | LIST      | READ                   | AP          | CVC                                           | IM         | VC                     | ATT         | DM         | OR          | ME         | AT         | PS          |
| P1                     | 90                     | 72          | 84         | 73        | 82          | 78          | 40                                            | 42                     | 77          | 83          | 71                   | 58        | 70                     | 93          | 88                                            | 49         | 62                     | 40          | 48         | 100         | 37         | 50         | 39          |
| P2                     | 75                     | 78          | 79         | 87        | 73          | 54          | 82                                            | 79                     | 69          | 83          | 57                   | 68        | 83                     | 87          | 79                                            | 69         | 72                     | 40          | 94         | 100         | 42         | 75         | 87          |
| P3                     | 55                     | 84          | 34         | 66        | 46          | 38          | 44                                            | 53                     | 77          | 83          | 57                   | 80        | 65                     | 73          | 63                                            | 44         | 66                     | 40          | 40         | 92          | 32         | 81         | 65          |
| P4                     | 50                     | 81          | 79         | 50        | 44          | 45          | 40                                            | 42                     | 62          | 42          | 57                   | 53        | 60                     | 93          | 80                                            | 44         | 69                     | 43          | 44         | 58          | 42         | 44         | 48          |
| P5                     | 25                     | 97          | 90         | 76        | 76          | 69          | 47                                            | 47                     | 85          | 58          | 86                   | 50        | 45                     | 85          | 77                                            | 44         | 66                     | 53          | 40         | 58          | 21         | 44         | 57          |
| P6                     | 20                     | 54          | 0          | 0         | 19          | 28          | 40                                            | 16                     | 31          | 67          | 43                   | 0         | 0                      | 58          | 88                                            | 40         | 96                     | 43          | 40         | 50          | 21         | 50         | 48          |
| P7                     | 90                     | 100         | 98         | 91        | 100         | 88          | 74                                            | 84                     | 100         | 100         | 100                  | 78        | 93                     | 98          | 95                                            | 90         | 84                     | 82          | 83         | 100         | 68         | 94         | 100         |
| P8                     | 100                    | 100         | 91         | 93        | 100         | 88          | 82                                            | 100                    | 92          | 92          | 86                   | 60        | 75                     | 98          | 93                                            | 53         | 78                     | 82          | 44         | 100         | 53         | 75         | 74          |
| P9                     | 70                     | 70          | 58         | 70        | 79          | 54          | 40                                            | 53                     | 62          | 83          | 57                   | 58        | 63                     | 95          | 87                                            | 49         | 72                     | 40          | 77         | 100         | 53         | 75         | 91          |
| P10                    | 90                     | 88          | 78         | 92        | 92          | 74          | 85                                            | 89                     | 77          | 92          | 57                   | 90        | 80                     | 92          | 84                                            | 57         | 69                     | 43          | 44         | 100         | 68         | 88         | 83          |
| P11                    | 85                     | 100         | 95         | 88        | 100         | 79          | 74                                            | 84                     | 92          | 92          | 86                   | 65        | 75                     | 85          | 83                                            | 65         | 60                     | 68          | 44         | 75          | 42         | 81         | 96          |
| P12                    | 90                     | 98          | 97         | 86        | 63          | 72          | 57                                            | 68                     | 85          | 58          | 57                   | 70        | 40                     | 98          | 63                                            | 57         | 72                     | 53          | 40         | 83          | 47         | 44         | 61          |
| P13*                   | 85                     | 100         | 98         | 86        | 84          | 89          | 74                                            | 95                     | 100         | 100         | 86                   | 63        | 73                     | 95          | 85                                            | 61         | 69                     | 64          | 44         | 92          | 47         | 94         | 91          |
| P14*                   | 85                     | 100         | 98         | 98        | 100         | 84          | 104                                           | 89                     | 100         | 83          | 86                   | 83        | 90                     | 95          | 91                                            | 81         | 69                     | 60          | 88         | 100         | 58         | 75         | 87          |
| P15                    | 100                    | 100         | 96         | 99        | 100         | 98          | 80                                            | 95                     | 100         | 100         | 100                  | 73        | 75                     | 97          | 94                                            | 85         | 86                     | 116         | 40         | 100         | 58         | 94         | 87          |
| P16                    | 100                    | 97          | 98         | 91        | 100         | 98          | 78                                            | 95                     | 92          | 100         | 86                   | 70        | 83                     | 98          | 91                                            | 78         | 87                     | 56          | 74         | 92          | 68         | 81         | 96          |
| P17*                   | 90                     | 100         | 92         | 98        | 100         | 94          | 92                                            | 95                     | 100         | 92          | 86                   | 78        | 80                     | 100         | 93                                            | 40         | 72                     | 60          | 40         | 100         | 84         | 94         | 96          |
| P18*                   | 55                     | 85          | 62         | 86        | 67          | 51          | 74                                            | 58                     | 77          | 75          | 43                   | 63        | 65                     | 85          |                                               | 61         | 64                     | 40          | 74         | 92          | 63         | 63         | 61          |
| P19*                   | 55                     | 75          | 52         | 68        | 55          | 58          | 44                                            | 32                     | 77          | 100         | 57                   | 58        | 75                     | 93          |                                               | 40         | 66                     | 40          | 44         | 92          | 47         | 81         | 78          |
| P20                    | 70                     | 70          | 60         | 58        | 53          | 66          | 40                                            | 32                     | 69          | 50          | 57                   | 65        | 65                     | 87          | 85                                            | 44         | 72                     | 40          | 44         | 83          | 16         | 44         | 43          |
| P21                    | 90                     | 100         | 98         | 97        | 100         | 100         | 80                                            | 95                     | 92          | 92          | 100                  | 73        | 73                     | 97          | 94                                            | 85         | 72                     | 77          | 40         | 100         | 53         | 81         | 83          |
| P22*                   | 95                     | 100         | 100        | 95        | 100         | 99          | 64                                            | 95                     | 100         | 100         | 71                   | 80        | 85                     | 95          | 96                                            | 73         | 84                     | 79          | 40         | 100         | 68         | 94         | 91          |
| <i>M</i>               | 76                     | 88          | 79         | 79        | 79          | 73          | 65                                            | 70                     | 83          | 83          | 72                   | 65        | 69                     | 91          | 85                                            | 60         | 73                     | 57          | 53         | 89          | 50         | 73         | 75          |
| <i>SD</i>              | 23                     | 14          | 26         | 22        | 24          | 21          | 20                                            | 26                     | 17          | 18          | 18                   | 18        | 20                     | 10          | 9                                             | 17         | 9                      | 20          | 19         | 15          | 17         | 19         | 19          |
| Range                  | 20 –<br>100            | 54 –<br>100 | 0 –<br>100 | 0 –<br>99 | 19 –<br>100 | 28 –<br>100 | 40 –<br>104                                   | 16 –<br>100            | 31 –<br>100 | 42 –<br>100 | 43 –<br>100          | 0 –<br>90 | 0 –<br>93              | 58 –<br>100 | 63 –<br>96                                    | 40 –<br>90 | 60 –<br>96             | 40 –<br>116 | 40 –<br>94 | 50 –<br>100 | 16 –<br>84 | 44 –<br>94 | 39 –<br>100 |

**Deferred Treatment/Usual Care Control Participants**

|           | Language            |             |             |             |             |             |                                               |                        |             |             |            |                      | Other Cognitive |                        |            |            |                                               |            |            |             |                        |             |             |
|-----------|---------------------|-------------|-------------|-------------|-------------|-------------|-----------------------------------------------|------------------------|-------------|-------------|------------|----------------------|-----------------|------------------------|------------|------------|-----------------------------------------------|------------|------------|-------------|------------------------|-------------|-------------|
|           | WAB-R (out of 100%) |             |             |             |             |             | RBANS<br>( <i>M</i> = 100,<br><i>SD</i> = 15) | SCCAN<br>(out of 100%) |             |             |            | DCT<br>(out of 100%) |                 | WAB-R<br>(out of 100%) |            |            | RBANS<br>( <i>M</i> = 100,<br><i>SD</i> = 15) |            |            |             | SCCAN<br>(out of 100%) |             |             |
|           | SS                  | AVC         | REP         | NWF         | READ        | WRITE       |                                               | LANG                   | OE          | SP          | RC         | WR                   | LIST            | READ                   | AP         | CVC        | IM                                            | VC         | ATT        | DM          | OR                     | ME          | ATT         |
| C1        | 85                  | 99          | 94          | 94          | 96          | 80          | 74                                            | 100                    | 100         | 75          | 71         | 80                   | 78              | 100                    | 72         | 69         | 60                                            | 56         | 44         | 100         | 32                     | 63          | 70          |
| C2*       | 55                  | 81          | 52          | 82          | 60          | 41          | 47                                            | 63                     | 77          | 50          | 43         | 63                   | 45              | 87                     | 80         | 44         | 72                                            | 40         | 44         | 83          | 53                     | 44          | 57          |
| C3        | 60                  | 80          | 85          | 76          | 100         | 85          | 78                                            | 63                     | 77          | 58          | 57         | 80                   | 93              | 93                     | 97         | 73         | 69                                            | 53         | 83         | 100         | 63                     | 81          | 78          |
| C4        | 85                  | 99          | 64          | 89          | 86          | 79          | 87                                            | 89                     | 77          | 83          | 57         | 95                   | 65              | 98                     | 97         | 73         | 84                                            | 49         | 94         | 100         | 58                     | 88          | 96          |
| C5        | 100                 | 100         | 100         | 98          | 98          | 87          | 87                                            | 89                     | 85          | 83          | 86         | 83                   | 83              | 93                     |            | 73         | 60                                            | 53         | 44         | 100         | 21                     | 81          | 87          |
| C6        | 100                 | 93          | 74          | 93          | 100         | 86          | 85                                            | 89                     | 92          | 100         | 57         | 78                   | 80              | 98                     |            | 40         | 84                                            | 64         | 52         | 100         | 47                     | 88          | 91          |
| C7*       | 90                  | 100         | 100         | 93          | 100         | 86          | 74                                            | 100                    | 92          | 100         | 86         | 70                   | 73              | 100                    | 92         | 78         | 60                                            | 56         | 44         | 83          | 47                     | 69          | 96          |
| C8        | 95                  | 100         | 98          | 100         | 100         | 100         | 92                                            | 100                    | 100         | 100         | 86         | 73                   | 93              | 98                     | 95         | 78         | 78                                            | 88         | 83         | 100         | 89                     | 100         | 100         |
| C9        | 60                  | 84          | 76          | 82          | 72          | 54          | 54                                            | 47                     | 69          | 83          | 57         | 88                   | 73              | 83                     |            | 53         | 69                                            | 40         | 77         | 92          | 32                     | 56          | 70          |
| C10*      | 95                  | 100         | 95          | 97          | 100         | 92          | 82                                            | 89                     | 100         | 92          | 57         | 85                   | 83              | 97                     | 94         | 69         | 64                                            | 79         | 80         | 100         | 74                     | 88          | 96          |
| C11*      | 90                  | 99          | 97          | 87          | 100         | 100         | 54                                            | 95                     | 85          | 100         | 71         | 60                   | 83              | 98                     | 86         | 78         | 84                                            | 64         | 40         | 100         | 42                     | 88          | 87          |
| C12*      | 95                  | 99          | 96          | 98          | 100         | 73          | 101                                           | 89                     | 100         | 100         | 86         | 65                   | 78              | 97                     |            | 73         | 66                                            | 60         | 40         | 100         | 63                     | 88          | 91          |
| C13*      | 45                  | 60          | 32          | 37          | 47          | 61          | 40                                            | 26                     | 54          | 92          | 57         | 73                   | 58              | 82                     |            | 40         | 78                                            | 40         | 44         | 58          | 42                     | 63          | 74          |
| C14       | 80                  | 84          | 86          | 91          | 85          | 89          | 74                                            | 89                     | 92          | 100         | 71         | 65                   | 70              | 95                     |            | 49         | 69                                            | 68         | 44         | 100         | 26                     | 81          | 91          |
| <i>M</i>  | 81                  | 91          | 82          | 87          | 89          | 79          | 74                                            | 81                     | 86          | 87          | 67         | 75                   | 75              | 94                     | 89         | 64         | 71                                            | 58         | 58         | 94          | 49                     | 77          | 84          |
| <i>SD</i> | 18                  | 12          | 21          | 16          | 17          | 17          | 18                                            | 22                     | 14          | 16          | 14         | 10                   | 13              | 6                      | 9          | 15         | 9                                             | 14         | 20         | 12          | 19                     | 16          | 13          |
| Range     | 45 –<br>100         | 60 –<br>100 | 32 –<br>100 | 37 –<br>100 | 47 –<br>100 | 41 –<br>100 | 40 –<br>101                                   | 26 –<br>100            | 54 –<br>100 | 50 –<br>100 | 43 –<br>86 | 60 –<br>95           | 45 –<br>93      | 82 –<br>100            | 72 –<br>97 | 40 –<br>78 | 60 –<br>84                                    | 40 –<br>88 | 40 –<br>94 | 58 –<br>100 | 21 –<br>89             | 44 –<br>100 | 57 –<br>100 |

*Note.* WAB-R = Western Aphasia Battery- Revised; RBANS = Repeatable Battery for Assessment of Neuropsychological Status Index Scores; SCCAN = Scales of Cognitive and Communicative Ability for Neurorehabilitation; DCT = Discourse Comprehension Test; SS = Spontaneous Speech; AVC = Auditory Verbal Comprehension; REP = Repetition; NWF = Naming and Word Finding; READ = Reading; WRITE = Writing; OE = Oral Expression; SP = Speech Comprehension; RC = Reading Comprehension; WR = Written Expression; LIST = Listening version; READ = Reading version; AP = Apraxia; CVC = Constructional, Visuospatial and Calculation; IM = Immediate Memory; VC = Visuospatial/Constructional; ATT = Attention; DM = Delayed Memory; OR = Orientation; ME = Memory; PS = Problem solving.

\* = Participant started as a deferred treatment/usual care control and transitioned to treatment group
