# Supplementary material
Source: publisher figshare collection journal article supplement (https://asha.figshare.com/articles/dataset/_/19320068)
Supplement: Supplementary file 5 [file 1]

#### Supplemental Material S4. Between-group analyses.

##### *Full results of two-way interaction model between timepoint\*subdomain accounting for group*

**Model syntax:** cbind(points scored, points missed) ~ timepoint \*(subdomain+group) +  
 etiology + (timepoint | participant) +(1 | item)

|                        |                                            |                  |             |         | Random effects: Variance (SD) |               |                                                   |
|------------------------|--------------------------------------------|------------------|-------------|---------|-------------------------------|---------------|---------------------------------------------------|
| Term                   |                                            | Log odds<br>(SE) | Probability | z-value | Significance<br>level         | Intercept: ID | Slope:<br>Intercept: Item;<br>Time-by-ID;<br>Corr |
| Intercept              |                                            | 0.22 (0.45)      | 0.55        | 0.49    | N.S.                          | 0.91          | 0.01                                              |
| Timepoint              |                                            | -0.08 (0.04)     | 0.48        | -1.92   | .055                          | (0.95)        | (0.11);<br>-0.24                                  |
| SubDomain              | Auditory                                   |                  |             |         |                               |               |                                                   |
|                        | Comprehension                              | 2.36 (0.40)      | 0.91        | 5.86    | ***                           |               |                                                   |
|                        | Verbal Expression                          | 1.83 (0.42)      | 0.86        | 4.40    | ***                           |               |                                                   |
|                        | Reading                                    |                  |             |         |                               |               |                                                   |
|                        | Comprehension                              | 1.81 (0.41)      | 0.86        | 4.45    | ***                           |               |                                                   |
|                        | Written Expression                         | 2.00 (0.47)      | 0.88        | 4.25    | ***                           |               |                                                   |
|                        | Orientation                                | 2.83 (0.58)      | 0.94        | 4.90    | ***                           |               |                                                   |
|                        | Memory                                     | -0.54 (0.40)     | 0.37        | -1.32   | N.S.                          |               |                                                   |
|                        | Problem Solving                            | 2.84 (0.58)      | 0.94        | 4.90    | ***                           |               |                                                   |
|                        | Visuospatial/<br>Constructional            | 0.80 (0.46)      | 0.69        | 1.74    | .08                           |               |                                                   |
|                        | Upper Limb/Facial/<br>Instrumental Apraxia | 2.72 (0.50)      | 0.94        | 5.41    | ***                           |               |                                                   |
| Group                  |                                            | 0.19 (0.04)      | 0.55        | 4.73    | ***                           |               |                                                   |
| Etiology               |                                            | -0.08 (0.34)     | 0.48        | -0.230  | N.S.                          |               |                                                   |
| Timepoint-<br>by-Group |                                            | 0.096 (0.04)     | 0.52        | 2.69    | **                            |               |                                                   |
| Timepoint-<br>by-      | Auditory                                   |                  |             |         |                               |               |                                                   |
|                        | Comprehension                              | 0.06 (0.03)      | 0.51        | 1.92    | .05                           |               |                                                   |

|                          |                                               |             |      |       |      |
|--------------------------|-----------------------------------------------|-------------|------|-------|------|
| SubDomain<br>interaction | Verbal Expression                             | 0.17 (0.03) | 0.54 | 6.03  | ***  |
|                          | Reading                                       |             |      |       |      |
|                          | Comprehension                                 | 0.05 (0.03) | 0.51 | 1.70  | .09  |
|                          | Written Expression                            | 0.10 (0.03) | 0.52 | 2.99  | **   |
|                          | Orientation                                   | 0.28 (0.14) | 0.57 | 2.00  | *    |
|                          | Memory                                        | 0.15 (0.03) | 0.54 | 5.05  | ***  |
|                          | Problem Solving                               | 0.23 (0.14) | 0.56 | 4.27  | ***  |
|                          | Visuospatial/Construc<br>tional               | 0.13 (0.04) | 0.53 | 3.58  | ***  |
|                          | Upper<br>Limb/Facial/Instrumen<br>tal Apraxia | 0.04 (0.56) | 0.51 | 0.784 | N.S. |

*Note.* Timepoint was coded as a numeric predictor: Group was dummy-coded with control as the reference level. Pre-treatment = "0"; Post-treatment 1 = "1"; Post-treatment 2 = "2"; Post-treatment 3 = "3." Etiology (i.e., TBI, non-TBI) was dummy-coded with non-TBI as the reference level. SubDomain was dummy-coded with Attention as the reference level. The correlation value refers to the strength of association between the random slope of timepoint and the random intercept of participant. The negative value reflects participants with lower baseline accuracy have steeper slopes.

***Full results of three-way interaction model between timepoint\*subdomain\*group***

cbind(obs\_score, (poss\_score - obs\_score)) ~ timepoint\_num \*

SubDomain \* Group + ET + (1 + timepoint\_num | ID) + (1 | domainitem)

**Random effects: Variance (SD)**

| Term                                          |                                 | Log odds<br>(SE) | Probability | z-value | Significance<br>level | Intercept:<br>ID | Intercept:<br>Item | Slope:<br>Time-by-<br>ID; Corr |
|-----------------------------------------------|---------------------------------|------------------|-------------|---------|-----------------------|------------------|--------------------|--------------------------------|
| Intercept                                     |                                 | 0.14 (0.46)      | 0.53        | 0.31    | N.S.                  | 0.91 (0.95)      | 2.05 (1.43)        | 0.01(0.11);<br>-0.22           |
| Timepoint                                     |                                 | -0.10 (0.06)     | 0.48        | -0.16   | ***                   |                  |                    |                                |
| Etiology                                      |                                 | -0.08 (0.34)     | 0.48        | -0.24   | N.S.                  |                  |                    |                                |
| Group                                         |                                 | 0.30 (0.08)      | 0.57        | 4.00    | ***                   |                  |                    |                                |
| SubDomain                                     | Auditory                        | 2.39 (0.41)      | 0.92        | 5.82    | ***                   |                  |                    |                                |
|                                               | Comprehension                   |                  |             |         |                       |                  |                    |                                |
|                                               | Verbal Expression               | 2.01(0.42)       | 0.88        | 4.75    | ***                   |                  |                    |                                |
|                                               | Reading                         | 2.07 (0.42)      | 0.89        | 4.95    | ***                   |                  |                    |                                |
|                                               | Comprehension                   |                  |             |         |                       |                  |                    |                                |
|                                               | Written Expression              | 2.20 (0.48)      | 0.90        | 4.56    | ***                   |                  |                    |                                |
|                                               | Orientation                     | 2.87 (0.62)      | 0.95        | 4.60    | ***                   |                  |                    |                                |
|                                               | Memory                          | -0.49 (0.41)     | 0.38        | -1.18   | N.S.                  |                  |                    |                                |
|                                               | Problem Solving                 | 2.75 (0.44)      | 0.94        | 6.20    | ***                   |                  |                    |                                |
|                                               | Visuospatial/<br>Constructional | 0.58 (0.47)      | 0.64        | 1.24    | N.S.                  |                  |                    |                                |
|                                               | Apraxia                         | 2.84 (0.52)      | 0.94        | 5.44    | ***                   |                  |                    |                                |
| Timepoint-<br>by-<br>SubDomain<br>interaction | Auditory                        | 0.17 (0.08)      | 0.54        | 2.16    | *                     |                  |                    |                                |
|                                               | Comprehension                   |                  |             |         |                       |                  |                    |                                |
|                                               | Verbal Expression               | 0.04 (0.7)       | 0.51        | 0.53    | N.S.                  |                  |                    |                                |
|                                               | Reading                         | 0.01 (0.08)      | 0.50        | 0.08    | N.S.                  |                  |                    |                                |
|                                               | Comprehension                   |                  |             |         |                       |                  |                    |                                |
|                                               | Written Expression              | -0.04 (0.09)     | 0.49        | -0.51   | N.S.                  |                  |                    |                                |
|                                               | Orientation                     | 0.37 (0.35)      | 0.59        | 1.06    | N.S.                  |                  |                    |                                |

|                                             |                                               |              |      |       |      |
|---------------------------------------------|-----------------------------------------------|--------------|------|-------|------|
| Timepoint-<br>by-Group                      | Memory                                        | 0.05(0.07)   | 0.51 | 0.74  | N.S. |
|                                             | Problem Solving                               | 0.26(0.13)   | 0.56 | 1.96  | *    |
|                                             | Visuospatial/Construc<br>tional               | -0.08(0.09)  | 0.48 | -0.94 | N.S. |
|                                             | Upper<br>Limb/Facial/Instrumen<br>tal Apraxia | -0.11(0.14)  | 0.47 | -0.80 | N.S. |
|                                             |                                               | 0.01 (0.07)  | 0.50 | 0.12  | N.S. |
|                                             | Auditory<br>Comprehension                     | -0.08 (0.10) | 0.48 | -0.87 | N.S. |
|                                             | Verbal Expression                             | -0.27 (0.09) | 0.43 | -3.05 | **   |
|                                             | Reading<br>Comprehension                      | -0.40 (0.10) | 0.40 | -3.90 | ***  |
|                                             | Written Expression                            | -0.28(0.11)  | 0.43 | -2.58 | **   |
|                                             | Orientation                                   | -0.08 (0.37) | 0.48 | -0.22 | N.S. |
| SubDomain<br>-by-Group                      | Memory                                        | -0.06(0.09)  | 0.49 | -0.62 | N.S. |
|                                             | Problem Solving                               | 0.13 (0.15)  | 0.53 | 0.87  | N.S. |
|                                             | Visuospatial/Construc<br>tional               | 0.44 (0.110) | 0.61 | 3.96  | ***  |
|                                             | Upper<br>Limb/Facial/Instrumen<br>tal Apraxia | -0.17(0.17)  | 0.46 | -0.97 | N.S. |
|                                             | Auditory<br>Comprehension                     | -0.11(0.09)  | 0.47 | -1.25 | N.S. |
|                                             | Verbal Expression                             | 0.18 (0.08)  | 0.54 | 2.31  | *    |
|                                             | Reading<br>Comprehension                      | 0.10 (0.09)  | 0.52 | 1.08  | N.S. |
|                                             | Written Expression                            | 0.19 (0.10)  | 0.55 | 2.04  | *    |
|                                             |                                               |              |      |       |      |
|                                             |                                               |              |      |       |      |
| Timepoint-<br>by-<br>SubDomain<br>-by-Group |                                               |              |      |       |      |
|                                             |                                               |              |      |       |      |
|                                             |                                               |              |      |       |      |
|                                             |                                               |              |      |       |      |
|                                             |                                               |              |      |       |      |

|                                               |              |      |       |      |
|-----------------------------------------------|--------------|------|-------|------|
| Orientation                                   | -0.10 (0.38) | 0.48 | -0.26 | N.S. |
| Memory                                        | 0.11 (0.08)  | 0.53 | 1.37  | N.S. |
| Problem Solving                               | -0.05(0.14)  | 0.49 | -0.32 | N.S. |
| Visuospatial/Construc<br>tional               | 0.18(0.10)   | 0.54 | 1.86  | N.S. |
| Upper<br>Limb/Facial/Instrumen<br>tal Apraxia | 0.19 (0.16)  | 0.55 | 1.24  | N.S. |

---

*Note.* Timepoint was coded as a numeric predictor: Pre-treatment = “0”; Post-treatment 1 = “1”; Post-treatment 2 = “2”; Post-treatment 3 = “3.” Group was dummy-coded with control as the reference level. Etiology was dummy-coded (i.e., TBI and non-TBI with non-TBI as the reference level). SubDomain was dummy-coded with Attention as the reference level. The correlation value refers to the strength of association between the random slope of timepoint and the random intercept of participant. The negative value reflects participants with lower baseline accuracy have steeper slopes.

***Full results of three-way interaction model between timepoint\*group\*etiology***

cbind(obs\_score, (poss\_score - obs\_score)) ~ timepoint\_num \* Group\*ET + (1 +  
timepoint\_num | ID) + (1 | domainitem)

**Random effects: Variance (SD)**

| Term                           | Log odds<br>(SE) | Probability | z-value | Significance<br>level | Intercept:<br>ID | Intercept:<br>Item | Slope:<br>Time-by-<br>ID; Corr |
|--------------------------------|------------------|-------------|---------|-----------------------|------------------|--------------------|--------------------------------|
| Intercept                      | 1.94 (0.27)      | 0.87        | 7.30    | $p < .001$            | 0.97             | 3.48               | 0.10                           |
| Timepoint                      | -0.01 (0.05)     | 0.50        | -0.18   | N.S.                  | (0.99)           | (1.87)             | (0.10);                        |
| Group                          | 0.05 (0.05)      | 0.51        | 0.93    | N.S.                  |                  |                    | -0.31                          |
| Etiology                       | -0.40 (0.36)     | 0.40        | -1.11   | N.S.                  |                  |                    |                                |
| Timepoint-by-Group             | 0.13 (0.05)      | 0.53        | 2.52    | $p < .011$            |                  |                    |                                |
| Timepoint-by-Etiology          | 0.11 (0.07)      | 0.53        | 1.65    | .098                  |                  |                    |                                |
| Group-by-Etiology              | 0.40 (0.08)      | 0.60        | 4.86    | $p < .001$            |                  |                    |                                |
| Timepoint-by-Group-by-Etiology | -0.11 (0.07)     | 0.47        | -1.50   | N.S.                  |                  |                    |                                |

**Note.** Timepoint was coded as a numeric predictor: Pre-treatment = “0”; Post-treatment 1 = “1”; Post-treatment 2 = “2”; Post-treatment 3 = “3.” Group was dummy-coded with control as the reference level. Etiology was dummy-coded (i.e., TBI and non-TBI with non-TBI as the reference level). SubDomain was dummy-coded with Attention as the reference level. The correlation value refers to the strength of association between the random slope of timepoint and the random intercept of participant. The negative value reflects participants with lower baseline accuracy have steeper slopes.



```
`E vs C_RC` =c (rep(0,times=11),1, 0, 0, 0, 0, 0, 0, 0, 0, 0, 0, 0, 0, 0, 0, 0, 0, 1, 0, 0, 0,
0, 0, 0, 0, 0, 0, 0, 0, 0),
`E vs C_VC` =c (rep(0,times=11),1, 0, 0, 0, 0, 0, 0, 0, 0, 0, 0, 0, 0, 0, 0, 0, 0, 1, 0, 0,
0, 0, 0, 0, 0, 0, 0, 0, 0),
`E vs C_VE` =c (rep(0,times=11),1, 0, 0, 0, 0, 0, 0, 0, 0, 0, 0, 0, 0, 0, 0, 0, 0, 1, 0,
0, 0, 0, 0, 0, 0, 0, 0, 0),
`E vs C_WR` =c (rep(0,times=11),1, 0, 0, 0, 0, 0, 0, 0, 0, 0, 0, 0, 0, 0, 0, 0, 0, 1, 0,
0, 0, 0, 0, 0, 0, 0, 0, 0),
`E vs C_AT` =c (rep(0,times=11),1, 0, 0, 0, 0, 0, 0, 0, 0, 0, 0, 0, 0, 0, 0, 0, 0, 0, 0, 0,
0, 0, 0, 0, 0, 0, 0, 0, 0))
```

**Key:** AC = auditory comprehension; AP = apraxia; ME = memory; OR = orientation; PS = problem solving; RC = reading comprehension; VC = visuospatial/constructional; VE = verbal expression; WR = written expression

### Code to extract the domain-specific intercepts

```
summary(glht(m_subdomain_group, contrast.matrix.intercept.group))
```

### Domain-specific slope contrast matrix

```
contrast.matrix.slope.group<-rbind(
`E vs C_AC`      = c(rep(0, times=22), 1, rep(0, times=9), 1, 0, 0, 0, 0, 0, 0, 0, 0, 0),
`E vs C_AP`      = c(rep(0, times=22), 1, rep(0, times=9), 0, 1, 0, 0, 0, 0, 0, 0, 0, 0),
`E vs C_ME`      = c(rep(0, times=22), 1, rep(0, times=9), 0, 0, 1, 0, 0, 0, 0, 0, 0, 0),
`E vs C_OR`      = c(rep(0, times=22), 1, rep(0, times=9), 0, 0, 0, 1, 0, 0, 0, 0, 0, 0),
`E vs C_PS`      = c(rep(0, times=22), 1, rep(0, times=9), 0, 0, 0, 0, 1, 0, 0, 0, 0, 0),
`E vs C_RC`      = c(rep(0, times=22), 1, rep(0, times=9), 0, 0, 0, 0, 0, 1, 0, 0, 0, 0),
`E vs C_VC`      = c(rep(0, times=22), 1, rep(0, times=9), 0, 0, 0, 0, 0, 0, 1, 0, 0, 0),
`E vs C_VE`      = c(rep(0, times=22), 1, rep(0, times=9), 0, 0, 0, 0, 0, 0, 0, 1, 0, 0),
`E vs C_WR`      = c(rep(0, times=22), 1, rep(0, times=9), 0, 0, 0, 0, 0, 0, 0, 0, 1, 0),
`E vs C_AT`      = c(rep(0, times=22), 1, rep(0, times=9), 0, 0, 0, 0, 0, 0, 0, 0, 0, 0))
```

### Code to extract the domain-specific intercepts

```
summary(glht(m_subdomain_group, contrast.matrix.slope.group))
```

**Key:** AC = auditory comprehension; AP = apraxia; ME = memory; OR = orientation; PS = problem solving; RC = reading comprehension; VC = visuospatial/constructional; VE = verbal expression; WR = written expression
